# Supplementary material for: Adverse Events Reporting Quality of Randomized Controlled Trials of COVID-19 Vaccine Using the CONSORT Criteria for Reporting Harms: A Systematic Review
Source: MDPI journal article supplement (doi:10.3390/vaccines10020313), 2022-02-17
Supplement: s1 [file s1]

### SEARCH TERMS USED FOR GATHERING DATA

| No | Database       | Keywords                                              | Note                                |
|----|----------------|-------------------------------------------------------|-------------------------------------|
| 1  | Pubmed         | covid-19 OR SARS-Cov-2, AND vaccine,<br>AND trial     |                                     |
| 2  | Science direct | covid 19 vaccine trial                                | advanced search on<br>title keyword |
| 3  | Google scholar | covid 19 vaccine trial OR SARS-Cov-2<br>vaccine trial |                                     |
| 4  | Bibliovid      | covid 19 vaccine trial                                |                                     |
