# Supplementary material for: Adverse Events Reporting Quality of Randomized Controlled Trials of COVID-19 Vaccine Using the CONSORT Criteria for Reporting Harms: A Systematic Review
Source: Vaccines (Basel). 2022 Feb 17;10(2):313. doi: 10.3390/vaccines10020313 (PMC8875800; doi:10.3390/vaccines10020313)
Supplement: Supplementary file 1 [file vaccines-10-00313-s001.zip]

Archive with 5 entries (5 files):
- Figure S1.pdf
- Figure S2.pdf
- Table S1.pdf
- Table S2.pdf
- Table S3.xlsx
