# Supplementary material for: Adverse Events Reporting Quality of Randomized Controlled Trials of COVID-19 Vaccine Using the CONSORT Criteria for Reporting Harms: A Systematic Review
Source: Vaccines (Basel). 2022 Feb 17;10(2):313. doi: 10.3390/vaccines10020313 (PMC8875800; doi:10.3390/vaccines10020313)
Supplement: Supplementary file 1 [file vaccines-10-00313-s001.zip › Table S3.xlsx]

## Sheet: Step 2 (2)
Characteristics of COVID-19 Randomized control trials included in this study (n=61)
No.	First Author	Study design	Intervention	control	Phase	Outcomes (Effectiveness indicators)	Serious Adverse Events (SAE)	Other Adverse Events
1	Jerald Sadoff et.al	Double-blind Placebo-controlled Multicenter RCT	Ad26.COV2.S (non replicating viral factor)	Placebo (Saline)	III	Vaccine efficacy against moderate to severe-critical COVID-19: 66.9% (≥14 days after injection) and 66.1% (≥28 days after injection) Vaccine efficacy against moderate COVID-19: 64.8% (≥14 days after injection) and 62% (≥28 days after injection) Vaccine efficacy against severe-critical COVID-19: 76.7% (≥14 days after injection) and 85.4% (≥28 days after injection)	Any SAE not related to COVID-19 (0.4%) SAE considered related to vaccination: Guillain-Barre syndrome (1), pericarditis (1), branchial radiculitis (1), hypersensitivity (1), bell's palsy (2), post-vaccination syndrome (1)	Injection-site pain (48.6%)/Headache (38.9%)/Fatigue (38.2%)/Myalgia (33.2%)/Nausea (14.2%)
2	Yanchun Che et.al	Double-blind Placebo-controlled Multicenter RCT	KMS-1 (inactivated virus)	Placebo (Alumunium Hydroxide in buffer)	II	0,14 procedure Neutralizing antibody response Day 14 after immunization: seroconversion rate 89% (medium-dose), 96% (high-dose); GMT 23 (medium-dose), 30 (high-dose) Day 28 after immunization: seroconversion rate 92% (medium-dose), 96% (high-dose); GMT 19 (medium-dose), 21 (high-dose) Anti-S antibody Day 14 after immunization: GMT 1883 (medium-dose), 2370 (high-dose) Day 28 after immunization: GM…	None	Any adverse reactions within 0-7 days 0,14 procedure : 24% (medium-dose), 27.3% (high-dose) 0,28 procedure : 26.7% (medium-dose), 19.3% (high-dose) Pain 0,14 procedure: 15.3% (medium-dose), 14.7% (high-dose) 0,28 procedure: 14% (medium-dose), 12% (high-dose) Itch 0,14 procedure: 2% (medium-dose), 4.7% (high-dose) 0,28 procedure: 1.3% (medium-dose) Redness 0,14 procedure: 1.3% (medium-dose), 0.7% …
3	Raches Ella et.al	Double-blind Multicenter RCT	BBV152 (whole-virion β-propiolactone-inactivated virus) 6 µg	BBV152 (whole-virion β-propiolactone-inactivated virus) 3 µg	I/II	Anti-spike glycoprotein IgG Day 28: seroconversion 71.2% (3 µg BBV152 with Algel-IMDG), 65% (3 µg BBV152 with Algel-IMDG); GMT 2574.2 (3 µg BBV152 with Algel-IMDG), 2240.5 (3 µg BBV152 with Algel-IMDG) Day 42: seroconversion 98.4% (3 µg BBV152 with Algel-IMDG), 98.3% (3 µg BBV152 with Algel-IMDG); GMT 11528.8 (3 µg BBV152 with Algel-IMDG), 10040 (3 µg BBV152 with Algel-IMDG) Day 56: seroconversio…	None	After dose 1 (days 0-7) Local adverse reaction: 4.7% (3 µg BBV152 with Algel-IMDG), 4.2% (6 µg BBV152 with Algel-IMDG) Systemic adverse reaction: 4.7% (3 µg BBV152 with Algel-IMDG), 7.4% (3 µg BBV152 with Algel-IMDG) After dose 2 (days 28-35) Local adverse reaction: 4.2% (3 µg BBV152 with Algel-IMDG), 3.7% (6 µg BBV152 with Algel-IMDG) Systemic adverse reaction: 6.3% (3 µg BBV152 with Algel-IMDG)…
4	Bihua Han et.al	Double-blind Placebo-controlled RCT	CoronaVac (β-propiolactone inactivated SARS-CoV-2 (strain CN02))	Placebo (Alumunium Hydroxide)	I/II	Phase I (after 28 days) Seroconversion rate 100% (1.5 µg and 3 µg group); GMT 55 (1.5 µg group), 117.4 (3 µg group) Phase II (after 28 days) Seroconversion rate 96.8% (1.5 µg group), 100% (3 µg group); GMT 86.4 (1.5 µg group), 142.2 (3 µg group)	None related to vaccination	Solicated adverse reactions within 0-7 days Any: 23% (1.5 µg group), 27% (3 µg group) Local Pain: 16% (each 1.5 and 3 µg group) Swelling: 1% (1.5 µg group), 3% (3 µg group) Induration: 1% (3 µg group) Erythema: <1% (3 µg group) Pruritus: 1% (each 1.5 and 3 µg group) Systemic Fever: 4% (1.5 µg group), 5% (3 µg group) Cough: 2% (1.5 µg group), 4% (3 µg group) Headache: 3% (1.5 µg group), 2% (3 µg g…
5	Cheryl Keech et.al	Placebo-controlled Multicenter RCT	NVX-CoV2373 (protein subunit) with or without adjuvant	Placebo (sterile 0.9% normal saline)	I/II	IgG ELISA anti-S protein (GMEU) Day 7: GMT 122.7 (group B), 131.8 (group C), 160.5 (group D), 180.8 (group E) Day 21: GMT 189.2 (group B), 1984.2 (group C), 2625.9 (group D), 3317.2 (group E) Day 28: GMT 206.9 (group B), 15318.8 (group C), 20429.2 (group D), 3503.2 (group E) Day 35: GMT 575.5 (group B), 63160.4 (group C), 47521 (group D), 2932 (group E) Neutralizing antibody Day 21: GMT 21.7 (gro…	After first dose 2 participant in group A and E (reactogenicity events-headache, fatigue, malaise) After second dose 1 participant in group D (tenderness), 8 participants (joint and fatigue)	After first vaccination (group A, B, C, D, E) Absent or mild local: 100%, 96%, 89%, 84%, 88% Absent or mild systemic: 91%, 92%, 96%, 68%, 89% After second vaccination (group A, B, C, D, E) Absent or mild local: 100%, 100%, 65%, 67%, 100% Absent or mild systemic: 86%, 84%, 73%, 58%, 96%
6	Denis Y Logunov et.al	Double-blind Placebo-controlled Multicenter RCT	Gam-COVID-Vac (non replicating viral vector)	Placebo (buffer)	III	Overall vaccine efficacy: 91.6% Vaccine efficacy against moderate/severe COVID-19: 100% Vaccine efficacy against first COVID-19 occurence after dose 1 (any time): 73.1% Vaccine efficacy against first COVID-19 occurence after dose 1 (14 days after): 87.6% Vaccine efficacy against first COVID-19 occurence after dose 2: 91.1% Anti-SARS-CoV-2 glycoprotein S Day 42: detected RBD-Specific IgG 98%, GMT …	None related to vaccination	Most common: flu-like illness, injection site reactions, headache, asthenia Grade 1 (94%), grade 2 (5.66%), grade 3 (0.38%)
7	Shabir A. Madhi et.al	Double-blind Multicenter RCT	ChAdOx1 nCoV-19 (non replicating viral vector)	Placebo (0.9% sodium chloride)	Ib/II	Neutralizing antibody Day 28 after first dose: GMT 132 After second dose: GMT 277 Vaccine efficacy 21.9% (mild-moderate illness with onset > 14 days after second injection) 10.4% (mild-to-moderate illness associated with B.1.351 variant with onset >14 days after second injection)	Fever >40oC (1 case)	General disorders and administration site condition (37.4%), nervous sytem disorders (17.9%), respiratory (15.2%), infections and infestations (13.3%), gastrointestinal disorders (9.9%), musculoskeletal and connective tissue disorders (4.3%), skin and subcutaneous tissue disorders (1.6%), investigations (2.9%), injury poisoning and procedural complication (1.2%), reproductive system and breast di…
8	Fernando P.Polack et.al	Observer-blind Placebo-controlled Multicenter RCT	BNT162b2 (nucleoside-modified RNA; RNA based vaccine)	Placebo (Saline)	II/III	Vaccine efficacy Covid-19 occurrence at least 7 days after the second dose in participants without evidence of infection): 95% Covid-19 occurrence at least 7 days after the second dose in participants with and those without evidence of infection: 94.6%	0,6%; shoulder injury, right axillary lymphadenopathy, paroxysmal ventricular arrythmia, right leg parasthesia	Any adverse event (27%), related adverse event (21%) Pain: 71% after first dose and 66% after second dose (older participants), 83% after first dose and 78% after secon dose (younger participants) Fatigue and headache: 51% and 39% (older participants), 59% anf 525 (younger participants)
9	Peter Richmond et.al	Double-blind Placebo-controlled RCT	SCB-2019 (protein subunit); non-adjuvanted, AS03-adjuvanted, CpG/Alum-adjuvanted	Placebo (0.9% NaCl)	I	Anti SCB-2019 IgG antibodies Younger adults (18-54 years) Day 22: seroconversion rate 50% (3 µg+AS03 adjuvant), 63% (9 µg+AS03 adjuvant), 25% (9 µg+CpG/Alum adjuvant), 88% (30 µg+AS03 adjuvant), 63% (30 µg+CpG/Alum adjuvant) Day 36: seroconversion rate 13% (3 µg no adjuvant), 100% (3 µg+AS03 adjuvant), 100% (3 µg+CpG/Alum adjuvant), 100% (9 µg+AS03 adjuvant), 100% (9 µg+CpG/Alum adjuvant), 14% (3…	None related to vaccination	Most local adverse events were mild injection-site pain; local events 44–69% (SCB-2019+AS03), 6-44% (SCB-2019+CpG/Alum), 3-13% (SCB-2019 only). Systemic adverse events in first dose 38% (younger adults), 17% (older adults), in second dose 34% (younger adults), 30% (older adults) Local reactions Adult 1 dose Pain: 12.5% (3 μg SCB-2019 no adjuvant), 62.5% (3 μg SCB-2019+AS03), 12.5% (3 μg SCB-2019 …
10	Feng-Cai Zhu et.al	Double-blind Placebo-controlled RCT	Ad5-vectored COVID-19 vaccine (non replicating viral vector)	Placebo	II	RBD-specific ELISA antibody Day 14: GMT 94.5 (1 x 10^11 vp group), 85.1 (5 x 10^10 vp group) Day 28: GMT 656.5 (1 x 10^11 vp group), 571 (5 x 10^10 vp group); seroconversion 96% (1 x 10^11 vp group), 97% (5 x 10^10 vp group) Neutralizing antibody Live SARS-CoV-2 Day 28: GMT 19.5 (1 x 10^11 vp group), 18.3 (5 x 10^10 vp group); seroconversion 59% (1 x 10^11 vp group), 47% (5 x 10^10 vp group) Pseu…	None	Solicited adverse reactions within 14 days Any: 72% (1 x 10^11 vp group), 74% (5 x 10^10 vp group) Pain: 57% (1 x 10^11 vp group), 56% (5 x 10^10 vp group) Fever: 32% (1 x 10^11 vp group), 16% (5 x 10^10 vp group) Fatigue: 42% (1 x 10^11 vp group), 34% (5 x 10^10 vp group) Headache: 29% (1 x 10^11 vp group), 28% (5 x 10^10 vp group) Unsolicited adverse reactions within 14 days Any: 8% (1 x 10^11 …
11	Yanjun Zhang et.al	Double-blind Placebo-controlled RCT	CoronaVac (β-propiolactone inactivated SARS-CoV-2 (strain CN02)) with different cultivation technology (Phase I: cell factory system, Phase II: highly automated bioreactor)	Placebo (Alumunium Hydroxide)	I/II	Phase I Neutralizing antibody 0,14 procedure Day 14: seroconversion rate 45.8% (3 µg group), 50% (6 µg group) Day 28: seroconversion rate 25% (3 µg group), 83.3% (6 µg group) 0,28 procedure Day 14: seroconversion rate 79.2% (3 µg group), 83.3% (6 µg group) Day 28: seroconversion rate 83.3% (3 µg group), 79.2% (6 µg group) RBD-IgG 0,14 procedure Day 14: seroconversion rate 83.3% (3 µg group), 100%…	Acute hypersensitivity-urticaria (1 case in 0,14 procedure 6 µg group)	Phase I Overall adverse events 0,14 procedure: 29% (3 µg group), 38% (6 µg group) 0,28 procedure: 13% (3 µg group), 17% (6 µg group) Injection site pain 0,14 procedure: 17% (3 µg group), 21% (6 µg group) 0,28 procedure: 13% (3 µg group), 13% (6 µg group) Phase II Overall adverse events 0,14 procedure: 33% (3 µg group), 35% (6 µg group) 0,28 procedure: 19% (3 µg group), 19% (6 µg group) Injection …
12	Shilong Yang et.al	Double-blind Placebo-controlled RCT	ZF2001 (protein subunit)	Placebo (Alumunium Hydroxide in buffer)	I/II	Phase I RBD-binding IgG Day 30: seroconversion rate 61.1% (25 µg group), 79% (50 µg group); GMT 23.1 (25 µg group), 40.8 (50 µg group) Day 60: seroconversion rate 100% (25 µg group), 100% (50 µg group); GMT 1077 (25 µg group), 825.5 (50 µg group) Day 90: seroconversion rate 100% (25 µg group), 100% (50 µg group); GMT 2719.5 (25 µg group), 2776.8 (50 µg group) Neutralizing antibody Day 30: serocon…	None related to vaccination	Phase I Overall any adverse events within 30 days: 70% (25 µg group), 90% (50 µg group) Solicited any adverse events within 7 days: 60% (25 µg group), 70% (50 µg group) Solicited any systemic adverse reactions: 20% (25 µg group), 25% (50 µg group) Solicited any local adverse reactions: 45% (25 µg group), 60% (50 µg group) Unsolicited any adverse reactions: 30% (25 µg group), 30% (50 µg group) Pha…
13	Shengli Xia et.al	Double-blind Placebo-controlled RCT	Inactivated virus	Alum with sterile phosphate-buffered saline	I/II	Phase I Neutralizing Antibody Seroconversion 100% (low dose), 95.8% (medium dose), 100% (high dose); GMT 316 (low dose), 206 (medium dose), 297 (high dose) Specific IgG-binding Antibody Seroconversion 100% (low dose), 100% (medium dose), 100% (high dose); GMT 415 (low dose), 349 (medium dose), 311 (high dose) Phase II Neutralizing Antibody Seroconversion 97.6% (0,14 group), 97.6% (0,21 group); GM…	None related to vaccination	Phase I 0-7 day Total adverse reactions: 20.8% (low dose), 16.7% (medium dose), 25% (high dose) Systemic reactions: 12.5% (medium dose), 4.2% (high dose) Local reactions: 20.8% (low dose), 4.2% (medium dose), 25% (high dose) 0-28 day Total adverse reactions: 20.8% (low dose), 16.7% (medium dose), 25% (high dose) Phase II 0-14 day Total adverse reactions: 6% (0,14 group), 16% (0,21 group) Systemic…
14	Shengli Xia et.al	Double-blind Placebo-controlled RCT	BBIBP-CorV (inactivated virus)	Placebo (Alumunium Hydroxide in saline)	I/II	Phase I 18-59 years Day 14: seroconversion rate 79% (2 μg group), 87% (4 μg group), 96% (8 μg group) Day 28: all seroconversion rate 100%; GMT 22.6 (2 μg group), 29.3 (4 μg group), 36.7 (8 μg group) Day 42: GMT 87.7 (2 μg group), 211.2 (4 μg group), 228.7 (8 μg group) ≥60 years Day 14: seroconversion rate 4% (2 μg group), 46% (4 μg group), 46% (8 μg group) Day 28: seroconversion rate 91% (2 μg gr…	None	Phase I 18-59 years All adverse reaction within 0-7 days: 46% (2 μg group), 33% (4 μg group), 46% (8 μg group); total 42% (vaccination group) Injection site adverse reactions within 0-7 days in vaccination group: pain (35%), swelling (4%), itch (1%), redness (1%) Systemic adverse reactions within 0-7 days in vaccination group: fever (6%), fatigue (3%), inappetence (1%), nausea (1%), constipation …
15	Zhiwei Wu et.al	Double-blind Placebo-controlled RCT	CoronaVac (inactivated vaccine)	Placebo (Aluminium hydroxide)	I/II	Phase 1 Seroconversion rates (Day 28 after first dose) : 3 µg (54.2%), 6 µg (62.5%) Seroconversion rates (Day 28 after second dose) : 3 µg (100.0%), 6 µg (95.7%) GMT (Day 28 after first dose) : 3 µg (6.9), 6 µg (9.1) GMT (Day 28 after second dose) : 3 µg (54.9), 6 µg (64.4) Phase 2 Seroconversion rates (Day 28 after second dose) : 1.5 µg (90.7%). 3 µg (98.0%), 6 µg (99.0%) GMT (Day 28 after secon…	Eight serious adverse events by seven (2% participants), but considered unrelated to vaccination	1.5 µg group Any adverse reaction (20%); local reactions (13%); systemic reactions (10%) 3 µg group Any adverse reaction (20%); local reactions (12%); systemic reactions (10%) 6 µg group Any adverse reaction (22%); local reactions (11%); systemic reactions (15%) Placebo Any adverse reaction (21%); local reactions (4%); systemic reactions (16%)
16	Edward E. Walsh et.al	Observer-blind Placebo-controlled RCT	BNT162b1 or BNT162b2 (RNA-based vaccine candidates)	Placebo	I	The serologic responses elicited by BNT162b1 and BNT162b2 were similar. Both vaccines elicited generally lower antigen-binding IgG and virus-neutralizing responses in participants 65 to 85 years of age than in those 18 to 55 years of age. Higher doses appeared to elicit somewhat higher antibody responses. The highest neutralization titers were measured in samples obtained on day 28 or 35 (7 or 14…	No serious adverse events were reported	Local Reaction Mild-to-moderate reactions after BNT162b1 (10 μg, 20 μg, or 30 μg), primarily pain at the injection site, within 7 days after injection, and were more frequent after the second dose. A similar pattern was observed after vaccination with BNT162b2 Systemic Events Mild-to-moderate fever and chills after BNT162b1 (10 μg, 20 μg, or 30 μg) in age 18-55, and milder in age 65-85 although m…
17	Merryn Voysey et.al	Single blind (COV001,C0V002,C0V003) double blind (COV005) Multicenter RCT	ChAdOx1 nCoV-19 (non replicating viral vector)	Placebo (saline) or control vaccine (MenACWY)	COV001 (I/II), COV002 (II/III), COV003 (III), COV005 (I/II)	Efficacy of ChAdOx1 nCoV-19 more than 14 days after a second dose Prespecified analyses (by SD/SD or LD/SD regiment) Primary symptomatic COVID-19 : 66.7% (overall), 63.1% (SD/SD), 80.7% (LD/SD) Asymptomatic or unknown infection (COV002 UK only) : 22.2% (overall), 2.0% (SD/SD), 49.3% (LD/SD) Any NAAT positive : 54.1% (overall), 49.5% (SD/SD), 67.6% (LD/SD), indicating potential reduction of transm…	SAEs occured 0.9% in the ChAdOx1 nCoV-19 group and 1.1% in the control group. The most common SAEs were infections and infestations in the ChAdOx1 nCoV-19 group (0.2%)and in the control group (0.3%). There were seven deaths considered unrelated to vaccination (two in the ChAdOx1 nCov-19 group and five in the control group), including one COVID-19-related death in one participant in the control gr…	Symptomatic and asymptomatic COVID-19 infection in more than 14 days after a booster dose Primary symptomatic COVID-19 Total 332 cases, 1.0% in the ChAdOx1 nCoV-19 group and 2.9% in the control group. In SD/SD regiment, 1% in the ChAdOx1 nCoV-19 group and 2.7% in the control group. In LD/SD regiment, 0.7% in the ChAdOx1 nCoV-19 group and 3.6% in the control group. Asymptomatic infection (COV002 U…
18	Merryn Voysey et.al	Single blind (COV001,C0V002,C0V003) double blind (COV005) Multicenter RCT	ChAdOx1 nCoV-19 (non replicating viral vector)	COV001, COV002: MenACWY COV003 MenACWY (first dose), saline (second dose) COV005: saline	COV001 (I/II), COV002 (II/III), COV003 (III), COV005 (I/II)	Vaccine efficacy 70.4% (all LD/SD and SD/SD recipients), 67.1% (any symptomatic COVID-19 disease), 62.1% (received two standard-dose vaccine), 90% (received low dose as first dose)	Any SAE (0.7%) Cardiac disorders (<0.1%), ear and labyrinth disorders (<0.1%), eye disorders (<0.1%), gastrointestinal disorders (0.1%), general disorders and administration site conditions (<0.1%); injury poisoning and procedural complications (0.15), infections and infestations (0.1%), investigations (<0.1%), neoplasm benign, malignant and unspecified (<0.1%), nervous system disorders (0.1%), m…	Reported on the local and systemic reactogenicity of ChAdOx1 nCoV-19 shown that it is tolerated and that the side-effects are less both in intensity and number in older adults, with lower doses, and after the second dose
19	Hong-Xin Fan	Double-blind Placebo-controlled RCT	KCONVAC (Inactivated vaccine)	Placebo (Aluminium hydroxide)	I/II	Seroconvertion rates (seroconverted for neutralising antibody to live virus, neutralising antibody to pseudovirus, and RBD-IgG) Phase I 87.5-100% of participants across the treatment groups (14 or 28 days after two doses), no seroconverted for the three antibodies in placebo group Phase II 83-100% across the treatment groups (14 or 28 days after two doses), only two participants at Day 0/14 regim…	Phase I One SAE (foot fracture) was reported in 10-μg vaccine group. No participant discontinued the study due to AE. Phase II No SAE was reported. No participant discontinued the study due to AE.	Phase I 13 (54%), 11(46%), and 7 (58%) participants reported at least one adverse event (AE), of whom 10 (42%), 6 (25%), and 6 (50%) participants reported at least one vaccination-related AE after receiving 5-μg vaccine, 10-μg vaccine, or placebo, respectively. The most common solicited injection-site AE and systemic AE across the three treatment groups were pain and fatigue, respectively. 14 par…
20	Paul A Goepfert et.al	Modified double-blind (observer-blinded) Placebo-controlled RCT	CoV2 preS dTM (prefusion S protein vaccine)	Placebo (saline)	I/II	GMT Single-dose Did not generate GMT above placebo levels in any group at D22 or D36 Two-doses GMTs increased for all adjuvanted vaccine groups by D36, but to a lesser extent among age ≥50 compared to 18-49. The highest GMT : 75.1 and 52.3 (HD + AS03 group at day 36) in age 18–49 and age ≥50, respectively. The unadjuvanted HD formulation did not differ substantially from those in the placebo grou…	Three SAEs were reported and were assessed as not related to the vaccine by the Investigator	Solicited injection site reactions Among adjuvanted vaccine, local reactions (pain, erythema, swelling, grade 3 reactions) occurred more frequently after the second dose than after the first dose, in both age strata. The unadjuvanted HD formulation had a low frequency of injection site reactions, similar to the placebo group.Less frequent and less severe in age ≥50 compared to 18-49 (across adjuv…
21	Jingxin Li et.al	Double-blind Placebo-controlled RCT	BNT162b1 (mRNA-based vaccine)	Placebo (Saline)	I	BNT162b1 induced robust interferon-γ T cell responses to a peptide pool including the RBD in both younger and older Chinese adults, and GMTs reached 2.1-fold (for younger participants) and 1.3-fold (for the older participants) that of a panel of COVID19 convalescent human sera obtained at least 14 days after positive SARS-CoV-2 PCR test	Only one serious adverse event was reported by an older participant, which was considered as not related to the vaccine or study procedure (they were involved in an accident that prevented them from receiving the boost dose)	Local reactions and systemic events were generally dose dependent, transient and mild to moderate. Fever was the only grade 3 adverse event
22	Lindsey R Baden et.al	Observer-blinded Placebo-controlled RCT	mRNA-1273 SARS-CoV-2 Vaccine	Placebo (Saline)	III	94.1% efficacy at preventing Covid-19 illness compared with placebo (95% CI, 89.3 to 96.8%; P<0.001), including severe disease	The frequency of serious adverse events (reported during the 28 days after injection) were rare and the incidence was generally similar in the two groups (0.6% in both groups).	Solicited local adverse event at the injection site More frequently in the mRNA-1273 group than in the placebo group after both the first dose (84.2%, vs. 19.8%) and the second dose (88.6%, vs. 18.8%) Solicited systemic adverse events More often in the mRNA-1273 group than in the placebo group after both the first dose (54.9%, vs. 42.2%) and the second dose (79.4%, vs. 36.5%). The severity of sys…
23	Pedro M Folegatti et.al	Single-blind RCT	ChAdOx1 nCoV-19 (a recombinant, non replicating chimpanzee adenovirus-vectored vaccine)	meningococcal conjugate vaccine (MenACWY)	I/II	Spike-specific T-cell responses peaked on day 14 (median 856 spot-forming cells per million peripheral blood mononuclear cells Anti-spike IgG responses rose by day 28 (157 EU], and were boosted following a second dose (639 EU) Neutralising antibody responses after single dose: 91% (measured in MNA80), 100% (measured in PRNT50). After a booster dose, all participants had neutralising activity (nin…	None related to vaccination	Local reaction Without prophylactic paracetamol Pain after vaccination, mostly mild to moderate intensity in 67% (ChAdOx1 nCoV-19), 38% (MenACWY). Tenderness, mostly mild intensity 83% (ChAdOx1 nCoV-19), 58% (MenACWY). With prophylactic paracetamol Pain after vaccination, by fewer participants, 50% (ChAdOx1 nCoV-19), 32% (MenACWY). Tenderness, 77% (ChAdOx1 nCoV-19), 46% (MenACWY). Systemic reacti…
24	Maheshi N Ramasamy et.al	Single-blind RCT	ChAdOx1 nCoV-19 (a recombinant, non replicating chimpanzee adenovirus-vectored vaccine)	Meningococcal conjugate vaccine (MenACWY)	II/III	Median anti-spike SARS-CoV-2 IgG responses 28 days after the boost dose 18–55 years: 20 713 AU/mL 56–69 years: 16170 AU/mL ≥70 years: 17561 AU/mL Neutralising antibody titres after a boost dose (median MNA80 at day 42 in the standard-dose groups) 18–55 years: 193 56–69 years: 144 ≥70 years: 161 By 14 days after the boost dose, >99% had neutralising antibody responses T-cell responses peaked at da…	None related to vaccination	Local reactions: 88% (18-55 years group), 73% (56-69 years group), 61% (>70 years group); most common: injection-site pain and tenderness Systemic reactions: 86% (18-55 years group), 77% (56-69 years group), 65% (>70 years group); most common: fatigue, headache, feverishness, myalgia
25	Mark J Mulligan et.al	Observer-blinded Placebo-controlled RCT	BNT162b1 (mRNA-based vaccine)	Placebo (saline)	I/II	Geometric mean concentrations (GMCs) of RBD-binding IgG 21 days after 1st dose increased, ranged from 534 to 1,778 U ml−1 (for all three dose levels), but for 100 μg BNT162b1 did not increase any further afterward 7 days after 2nd dose : Increased to 4,813 and to 27,872 U ml−1 (for the 10-μg and 30-μg dose levels). The GMT of 10 μg and 30 μg were, respectively, 1.8-fold and 2.8-fold the GMT of th…	None	Solicited local reaction (in 7 days after each vaccination) All local reactions were mild or moderate in severity except for one report of severe pain after the first dose of 100 μg BNT162b1. The most-frequent solicited local reaction was pain at the injection site with 58.3% (10 μg BNT162b1), 100.0% (30 μg and 100-μg BNT162b1), 22.2% (placebo) after 1st vaccination; and 83.3% (10 μg BNT162b1), 1…
26	Keith J Chappell et.al	Double-blind Placebo-controlled RCT	SARS-CoV-2 Sclamp vaccine (a subunit vaccine)	Placebo (saline)	I	GMRT Serum antibody responses to SARS-CoV-2 sclamp vaccine increased in a similar manner in all two-dose groups, irrespective of dose concentration. Geometric mean antigen-specific responses were significantly greater than placebo for all dose groups at days 15, 29, and 43, and for the two-dose groups at day 57. Day 29 6400 (treatmen A), 7492 (treatment B), 8770 (treatment C), 8793 (treatment D),…	None	Solicited adverse events 79% (placebo), 92% (treatment A), 96% (treatment B), 88% (treatment C), 83% (treatment D) The most common solicited local adverse events Most local adverse events were mild or moderate. Pain in 54% (vaccine), 17% (placebo); tenderness in 56% (vaccine), 11% (placebo) The most common solicited systemic adverse event The rates of solicited systemic adverse events were simila…
27	Laurence Chu et.al	Observer-blind Placebo-controlled RCT	mRNA-1273 SARS-CoV-2 vaccine	Placebo (saline)	II	GMT Day 29 (28 days post-first-vaccination) 50 μg of mRNA-1273 : 184 (age ≥18-<55), 160 (age ≥55) 100 μg of mRNA-1273 : 273 (age ≥18-<55), 185 (age ≥55) control : 47.3 (age ≥18-<55), 47.3 (age ≥55) Day 43 (14 days post-second-vaccination) 50 μg of mRNA-1273 : 1733 (age ≥18-<55), 1827 (age ≥55) 100 μg of mRNA-1273 : 1909 (age ≥18-<55), 1686(age ≥55) control : 45.6 (age ≥18-<55), 47.3 (age ≥55) Day…	One SAE of community-acquired pneumonia occurred on day 33 at 50 μg mRNA-1273 in the older cohort, resolved on day 58 and led to study vaccine discontinuation. This event was considered not related to investigational vaccine by the investigator	Solicited local and systemic ARs ARs of mRNA-1273 (after 1st and 2nd dose) mainly mild or moderate in severity, with higher incidence than placebo. But the incidence of grade 3 reactions increased after the second vaccination, particularly for systemic reactions. The greatest overall incidence of grade 3 reactions was reported for fatigue (9.1%) and myalgia (7.6%) after the second dose of 100 μg …
28	Jerald Sadoff et.al	Double-blind Placebo-controlled Multicentre RCT	Ad26.COV2.S1 (replication-incompetent adenovirus serotype 26 (Ad26) vector encoding a full-length and stabilized SARS-CoV-2 spike protein)	Placebo (Saline)	I/IIa	Binding-Antibody geometric mean concentration (GMC) Cohort 1a Day 29: 478 (low-dose/placebo group), 586 (low-dose/low-dose), 625 (high-dose/placebo group), 788 (high-dose/high-dose group) Day 57: 660 (low-dose/placebo group), 754 (low-dose/low-dose), 2292 (high-dose/high-dose group) 14 days after second dose: 1677 (low-dose/low-dose), 873 (high-dose/placebo group), 1100 (high-dose/high-dose group…	One hypotension (not related), one bilateral nephrolithiasis (not related), one legionella pneumonia (not related), one multiple sclerosis (not related), one fever that resulted in hospitalization (related), 5 cases	Solicited local adverse event 64% (cohort 1 low-dose), 78% (cohort 1 high-dose), 41% (cohort 3 low-dose), 42% (cohort 3 high-dose), placebo (9%). The most frequent solicited adverse events: fatigue, headache, myalgia, injection-site pain. The most frequent systemic adverse event: fever.
29	Raches Ella et.al	Double-blind Placebo-controlled Multicentre RCT	BBV152 (whole-virion ꞵ-propiolactone-inactivated SARS-CoV-2 vaccine)	Placebo (phosphate-buffered solution + Algel)	I	Seroconversion rate (MNT50) After second dose: 87.9% (3 µg + Algel-IMDG group), 91.9 (6 µg + Algel-IMDG group), 82.8% (6 µg + Algel group) Seroconversion rate (PRNT50) After second dose: 93.4% (3 µg + Algel-IMDG group), 86.4 (6 µg + Algel-IMDG group), 86.6% (6 µg + Algel group) Anti-nucleoprotein IgG titres (GMT) After second dose: 61.7 (3 µg + Algel-IMDG group), 66.4 (6 µg + Algel-IMDG group), 4…	One viral pneumonitis (unrelated)	The most common solicited adverse events: injection site pain (5%), headache (3%), fatigue (3%), fever (25), nausea/vomiting (2%)
30	Robert W. Frenck, Jr. et.al	Observer-blind Placebo-controlled Multinational	BNT162b2 (nucleoside-modified messenger RNA encoding the severe acute respiratory syndrome coronavirus 2 (SARS-CoV-2) spike glycoprotein)	Placebo (Saline)	III	Geometric Mean Ratio (12-15 years old to 16-25 years old): 1.76 Geometric Mean Titer (GMT50) 1 month after dose 2 12-15 years old: 1239.5, 16-25 years old: 705.1 Vaccine efficacy Covid-19 occurrence at least 7 days after dose 2 in participants without evidence of previous infection: 100% Covid-19 occurrence at least 7 days after dose 2 in participants with or without evidence of previous infectio…	None related to vaccination	Mainly transient mild-moderate reactogenicity (injection-site pain 79-86%, fatigue 60-66%, and headache 55-65%)
31	Peter G. Kremsner et.al	Observer-blind Placebo-controlled Multicenter	CVnCoV (COVID-19 vaccine containing sequence_x0002_optimized mRNA coding for a stabilized form of SARS_x0002_CoV-2 spike (S) protein encapsulated in lipid nanoparticles (LNP))	Placebo (Saline)	I	Seroconversion rate S protein IgG Day 29: 6-26% Day 36: 50-74% Day 43: 69-95%; median titer 1738 (2 µg), 2239 (4 µg), 2818 (6 µg), 3135 (8 µg), 5118 (12 µg) RBD IgG Day 29: 3-4% Day 36: 17-65% Day 43: 38-91%; median titer 1228 (8 µg), 1572 (12 µg) S protein or RBD IgG Day 29: 6-26% Day 43: 79-100% Virus neutralizing titers (MN50) Day 29: 3-14% Day 36: 31-59% Day 43: 56-83%, median 57 MN50 (7-113 …	None related to vaccination	The most frequent solicited systemic adverse events: headache (39-88% of vaccine group, 33% of placebo group) and fatigue (34-88% of vaccine group, 42% of placebo group) The most frequent unsolicited adverse events: dizziness
32	Fan-Yue Meng et.al	Double-blind Placebo-controlled RCT	SF9 cells (baculovirus vectored vaccine expressing SARS-CoV-2 spike protein receptor binding domain (S-RBD)) in SF9 cells	Alumunium hydroxide	I/II	RBD Antibodies Phase I Day 28 GMT Adult: 39.3 (low dose), 96.9 (high dose, 2 doses), 1282.1 (high dose, 3 doses) Elderly: 42.9 (low dose), 45.1 (high dose, 2 doses), 548.2 (high dose, 3 doses) Seroconversion Adult: 29% (low dose), 58% (high dose, 2 doses), 96% (high dose, 3 doses) Elderly: 28% (low dose), 28% (high dose, 2 doses), 78% (high dose, 3 doses) Phase II Day 30 GMT Adult: 40 (low dose),…	None related to vaccination	The most common solicited injection site adverse reaction within 7 days: Phase I: pain (20% in adult group, 8% in elderly group) Phase II: pain (11% in adult group, 6% in elderly group) The most common systematic adverse reaction within 7 days: Phase I: fatigue (5% in adult group, 4% in elderly group), cough (5% in adult group, 3% in elderly group), sore throat (5% in adult group, 3% in elderly g…
33	Xinxue Liu et.al	Participant-blind Multicentre	BNT162b2 (nucleoside-modified messenger RNA encoding the severe acute respiratory syndrome coronavirus 2 (SARS-CoV-2) spike glycoprotein) and ChAdOx1 nCoV-19 (non-replicating chimpanzee adenovirus-vectored vaccine that expresses the full-length spike (FLS) glycoprotein gene of SARS_x0002_CoV-2)	No	II	Geometric Mean Concentration SARS-CoV-2 anti spike IgG Prime with ChAd: 1392 ELU/mL (ChAd/ChAd), 12906 ELU/mL (ChAd/BNT); GMR 9.2 Prime with BNT: 7133 ELU/mL (BNT/ChAd), 14080 ELU/mL (BNT/BNT), GMR 0.51	None related to vaccination	Primed with ChAd: grade 1 (55.4% ChAd/ChAd, 56.3% ChAd/BNT); grade 2 (35.1% ChAd/ChAd, 32.4% ChAd/BNT); grade 3 (8.1% ChAd/ChAd, 11.3% ChAd/BNT); grade 4 (1.4% ChAd/ChAd) Primed with BNT: grade 1 (59.3% BNT/BNT, 59.4% BNT/ChAd); grade 2 (39.5% BNT/BNT, 37.8% BNT/ChAd); grade 3 (1.2% BNT/BNT, 7.8% BNT/ChAd)
34	Ya-Jun Shu et.al	Double-blind Placebo-controlled	V-01 (dimerized interferon-armed receptor-binding domain (RBD) from the S1 subunit of spike protein containing vaccine)	Placebo (Aluminium hydroxide in buffer)	II	Geometric Mean Titer (GMT) Younger adults Day 28: 68 (10 µg), 77.1 (25 µg) Day 35: 161.9 (10 µg), 149.3 (25 µg) Day 49: 117 (10 µg), 121.7 (25 µg) 50 µg: 5 (day 7), 14.7 (day 14), 24.9 (day 28) Older adults Day 28: 28.5 (10 µg), 41.2 (25 µg) Day 35: 111.6 (10 µg), 111.1 (25 µg) Day 49: 99.2 (10 µg), 118.1 (25 µg) 50 µg: 5.1 (day 7), 11 (day 14), 21.4 (day 28)	None related to vaccination	The most common solicited local adverse reactions: injection-site pain Younger agults: 7.5% in 10 µg two doses, 5% in 25 µg two doses, 7.5% in 50 µg one dose Older adults: 5% in 10 µg two doses, 3.3% in 50 µg one dose
35	Mine Durusu Tanriover	Double-blind Placebo-controlled Multicenter	CoronaVac (inactivated whole-virion SARS-CoV-2 vaccine)	Placebo (Aluminium hydroxide)	III	Vaccine efficacy: 83.5% Seroconversion rate: 89.7%	Six serious adverse effects, one related with the vaccine (one grade 3 systemic allergic reaction resolved in 24 hours)	Pain (2.36%), erythema (0.18%), paraesthesia (0.14%), swelling (0.06%), induration (0.05%), pruritus (0.03%), fatigue (8.22%), headache (5.91%), myalgia (4.02%), chill (2.47%), fever (1.81%), diarrhoea (1.59%), cough (0.75%), arthralgia (0.71%), nausea (0.69%), vomiting (0.26%), rash (0.11%), allergic reaction (0.08%)
36	Jing Pu et.al	Double-blind Placebo-controlled	SARS-CoV-2 inactivated vaccine	Placebo (Al(OH)3 and saline)	I	Seroconversion rate 0,14 schedule, day 7 after booster: 54.2% (low dose), 100% (medium dose), 87.5% (high dose) 0,14 schedule, day 14 after booster: 87.5% (low dose), 100% (medium dose), 95.8% (high dose) 0,28 schedule, day 7 after booster: 54.2% (low dose), 79.2% (medium dose), 69.6% (high dose) 0,28 schedule, day 28 after booster: 79.2% (low dose), 95.8% (medium dose), 87.5% (high dose) Geometr…	None	The most common adverse reaction: mild pain, redness at the injection site, slight fatigue
37	Alberto M Borobia et.al	Open-label Multicentre	BNT162b2 (mRNA vaccine)	No	II	Antibodies specific SARS-CoV-2 RBD Geometric Mean Titer Day 14: 7756.68 BAU/mL Antibodies against SARS-CoV-2 spike protein Geometric Mean Titer Day 7: 2246.25 BAU/mL Day 14: 3684.87 BAU/mL Interventional:control ratio RBD: 77.69 Trimeric spike protein IgG: 36.41	None	The most commonly reported adverse events: injection site pain (88%), induration (35%), headache (44%), myalgia (43%)
38	Shipo Wu et.al	Open-label Multicentre	Ad5-nCov (replication-defective adenovirus type-5 vectored vaccine encodes the SARS-CoV-2 spike protein)	No	I	Neutralizing Antibody Geometric Mean Titer (GMT) 107 (HDmu group), 105 (LDmu group), 396 (MIX group), 95 (1Dim group), 180 (2Dim group) Receptor binding IgG domain 261 EU/mL (HDmu group), 289 (LDmu group), 2013 (MIX group), 915 (1Dim group), 1190 (2Dim group)	None	The most common reported 7 days after the first or booster vaccine: fever (48%), fatigue (31%), headache (35%)
39	ShengLi Xia et.al	Double-blind	BBIBP-CorV (inactivated COVID-19 vaccine)	Alumunium hydroxide and saline	I/II	Neutralizing Antibody Geometric Mean Titer (GMT) Day 28 after second vaccination: 105.3-180.2 (3-5 years cohort), 84.1-168.6 (6-12 years cohort), 88-155.7 (13-17 years cohort) Day 28 after third vaccination: 143.5-224.4 (3-5 years cohort), 127-184.8 (6-12 years cohort), 150.7-199 (13-17 years cohort)	None	The most common injection site adverse events: Pain (4% in 3-5 years cohort, 9.1% in 6-12 years cohort, 7.9% in 13-17 years cohort) The most common systemic adverse events: Fever (12.7% in 3-5 years cohort, 5.2% in 6-12 years cohort, 3% in 13-17 years cohort)
40	Kunsulu Zakarya et.al	Single-blind Placebo-controlled Single centre	QazCovid-in (inactivated whole virion vaccine)	Normal saline (Phase I)	I/II	Seroconversion 59% (after first dose), 100% (after second dose) Neutralizing Antibody Geometric Mean Titer (GMT) Day 21: 5.1 Day 42: 100 Day 180: 7 Cytokine response (pg/mL) Day 1: 13.4 (IFN-α), 1.3 (IFN-ᵧ), 1 (IL-4), 5.2 (IL-6), 0.6 (TNF-α) Day 7: 50.7 (IFN-α), 12.7 (IFN-ᵧ), 2 (IL-4), 30.5 (IL-6), 3.9 (TNF-α) Day 21: 818.8 (IFN-α), 25.2 (IFN-ᵧ), 3.6 (IL-4), 141.6 (IL-6), 12.7 (TNF-α) Day 27: 416…	None	Phase I: pain at the injection site (27%), fever (4.5%) Phase II: pain, hyperaemia, induration, itch; fever, general weakness, muscle pain, drowsiness, fatigue, malaise (up to 4% of subjects in each group)
41	Michiko Asano et. al	Double-blind Placebo-controlled Multicenter	AZD1222 (ChAdOx1 nCoV-19) (viral vector vaccine)	Placebo (saline)	I/II	Positive seroresponses to SARS-CoV-2 spike and receptor binding domain antigens were seen in all 174 participants who received two doses of AZD1222 (100%). Neutralizing antibody seroresponses were seen in 67.5%, 60.3% and 50.0% of participants receiving AZD1222 aged 18–55, 56–69 and ≥70 years, respectively. For participants aged 18–55, 56–69 and ≥70 years, peak nAb GMTs on Day 57 were 107.3 (95% …	None	The most common reported reactions: tenderness at the injection site, malaise, fatigue, muscle pain, and headache
42	Szu Min Hsieh et. al	Double-blind Placebo controlled	MVC-COV1901 (protein subunit) containing pre-fusion-stabilised spike protein S-2P adjuvanted with CpG 1018 and aluminium hydroxide	Placebo (saline)	II	At 28 days after the second dose of MVC-COV1901, the wild-type SARS-CoV-2 neutralising antibody GMT was 662,3 (95% CI 628,7–697,8; 408,5 IU/mL), the GMT ratio (geometric mean fold increase in titres at day 57 vs baseline) was 163,2 (155,0–171,9), and the seroconversion rate was 99,8% (95% CI 99,2–100,0).	None	The most common reported reactions: pain in the injection site (71,2%), malaise (36%), fatigue (29.7%), fever (0,7%) in vaccine group
43	Eddy Faldyana et. al	Single-blind Placebo controlled	Inactivated SARS-CoV-2 vaccine	Placebo (water for injection)	III	Antibody IgG titer determined by enzyme-linked immunosorbent assay was 97.48% for the seroconversion rate. Using a neutralization assay, the seroconversion rate was 87.15%. The efficacy in preventing symptomatic confirmed cases of COVID-19 occurring at least 14 days after the second dose of vaccine using an incidence rate was 65.30%.	None	The most common reported reactions: pain in the injection site, fever, myalgia
44	A. R. Falsey et. al	Double blind Placebo-controlled	AZD1222 (ChAdOx1 nCoV-19) (viral vector)	Placebo (saline)	III	Overall estimated vaccine efficacy was 74.0% (95% confidence interval [CI], 65.3 to 80.5; P<0.001) and estimated vaccine efficacy was 83.5% (95% CI, 54.2 to 94.1) in participants 65 years of age or older.	None	The most common adverse events: general pain (8.2%), headache (6.2%), injection site pain (6.8%), and fatigue (5.1%) in vaccine groups
45	Raches Ella et.al	Double blind	BBV152 (whole virion inactivated SARS-CoV-2 vaccine)	Placebo (Algel without IMDG or inactivated virus antigen)	III	Vaccine efficacy: 77,8% At day 56 GMT (expressed as MNT50) for vaccine lots 1 (130,3), lot 2 (121,2), lot 3 (125,4). GMT for placebo group 13,7. For all three lots combined, the GMTs at day 56 (expressed as arbitrary ELISA units per mL) were 9742 (95% CI 8949–10 606) for S1 protein, 4124 (3731–4557) for RBD, and 4161 (3736–4633) for N protein.	None	The most common solicited adverse events: pain at the injection site, headache, fever, fatigue
46	Alasdair P S Munro et. al	Single-blind Multicenter	Boosters: ChAdOx-nCov19, NVX-CoV2373, BNT162b2, VLA2001, Ad26.COV2.S, mRNA1273, CVnCoV	No	II	For ChAd/ChAd-primed individuals, spike IgG geometric mean ratios (GMRs) measured with ELISA between study vaccines and controls ranged from 1,8 in the half VLA group to 32,3 in the m1273 group. GMRs for wild-type cellular responses compared with controls ranged from 1,1 for ChAd to 3,6 for m1273. For BNT/BNT-primed individuals, spike IgG GMRs ranged from 1,3 in the half VLA group to 11,5 in the …	Four possibilities related to vaccine: liver injury (VLA), nervous system disorder (Ad26), cardiac disorder (VLA), vascular disorder (BNT)	The most common solicited local and systemic adverse events: fatigue and pain
47	Scott A Halperin et. al	Double-blind Placebo controlled	Ad5-nCoV (viral vector)	Placebo (exipients)	III	One dose of Ad5-nCoV showed a 57,5% (95% CI 39,7–70,0, p=0·0026) efficacy against symptomatic, PCR-confirmed, COVID-19 infection at 28 days or more postvaccination.	None	The most common adverse reaction: pain at the injection site (59%), redness and swelling (< 10%), headache (44,2%), muscle ache (41,2%), drowsiness (40%), fever (12,5%) on vaccine recipient
48	Yuyi Liao et. al	Double-blind Placebo-controlled	Recombinant COVID-19 vaccine containing fusion protein/protein subunit (IFN-PADRE-RBD-Fc dimer)	Alumunium hydroxide	I	Seroconversion rate Neutralization antibody mostly below 70% at day 21 and were above 95% in all vaccinated groups at day 49 RBD binding above 90% at day 21 and 100% in all groups at day 35 and day 49 except adults that receive 25 μg dose. GMT: measured using ELISA Neutralizing antibodies with a GMT of 112.2 (95%CI: 82.27–153), 71.6 (57.2–134.6) from elder adults were noted in the 10, 25, and 50 …	None	The most common solicited local reactions: pain and pruritus at the injection site Systemic reactions: fever, anorexia, muscle pain, and headache
49	Wanshen Guo et. al	Double blind Placebo-controlled	Inactivated SARS-CoV-2 vaccine (unknown name)	Alumunium hydroxide	I/II	Phase I GMT of neutralizing antibody titer after 90 days of third injection among younger adults with dose 2,5 μg: 87; 5 μg: 128; 10 μg: 129. Among older adults with dose 2,5 μg: 99; 5 μg: 99; 10 μg: 120. Phase II Among younger adults, the GMT was 20 in the 5μg (days 0 and 14 group), 53 in the 5μg (days 0 and 21 group), 44 in the 5μg (days 0 and 28 group), and 7 in the 10μg (day 0 group). Among o…	None related to vaccination	The most common reported reactions: injection site pain, fever
50	Peter G. Kremsner et.al	Single-blind Placebo-controlled	CVnCoV (mRNA vaccine)	Placebo (NaCl 0.9%)	IIB/3	Vaccine Efficacy In participants aged 18–60 years, vaccine efficacy against symptomatic disease was 52,5%. Too few cases of COVID-19 in participants 61 years or older to allow meaningful assessment of vaccine efficacy.	Related to CVnCoV recipients: acute myocardial infarction, atrial fibrillation, cardiac arrest (n= 1), supraventricular extra systoles, tachycardia (n=1), cellulitis (n=1), seizure (n=1)	The most common reported reactions: injection site pain, fatigue, headache.
51	Gang Zeng et. al	Double blind Placebo-controlled	CoronaVac (inactivated whole-virion SARS-CoV-2 vaccine)	Aluminium hydroxide	II	Seropositivity after an 8-month third dose was 98–100% regardless of age group. A third dose of CoronaVac given at month 2 after the second dose moderately increased neutralising antibody levels induced by the first two doses. 1a-14d-2m (18-59 years, given 14 days apart, third dose is 2 months after second dose) 2a-28d-2m (above 60 years, given 28 days apart, third dose is 2 months after second d…	No serious adverse event in either trial was considered by the investigators to be related to vaccination	The most common reported reactions within 28 days after the third dose: injection site pain
52	Prasad S Kulkarni, MD et. al	Single-blind Controlled	SII-ChAdOx1 nCoV-19 or AZD1222 (viral vector)	Placebo (formulated similarly to SII-ChAdOx1 nCoV-19/ AZD1222 except that it did not contain any viral particles)	II/III	Seroconversion rate for anti-spike IgG antibodies. After two doses, seroconversion rates for anti-spike IgG antibodies were more than 98% in both the groups. SII-ChAdOx1 nCoV-19 was non-inferior to AZD1222 (GMT ratio 0,98) - After first dose (day 29), both groups GMT >6600 AU/mL - After second dose (day 29), both groups GMT > 28500 AU/mL. - GMT ratio for anti-S IgG antibodies between both vaccine…	None related to vaccination	Common reactions (frequency ≥ 1%): injection site pain, warmth, induration, erythema, swelling and pruritus and systemic reactions of myalgia, fatigue, malaise, headache, chills, arthralgia, pyrexia and nausea
53	S. J. Thomas et. al	Single-blind Placebo-controlled	BNT162b2 (mRNA vaccine)	Placebo (saline)	II-III	Vaccine efficacy against Covid-19 was 91.3% (95% confidence interval [CI], 89.0 to 93.2) through 6 months of follow-up among the participants without evidence of previous SARS-CoV-2 infection who could be evaluated. Vaccine efficacy against severe disease was 96.7% (95% CI, 80.3 to 99.9). In South Africa, where the SARS-CoV-2 variant of concern B.1.351 (or beta) was pre-dominant, a vaccine effica…	No new serious adverse event related to BNT162b2	The most common reaction: mild to moderate pain at the injection site, fatigue
54	Kashif Ali et. al	Single-blind Placebo-controlled	mRNA-1273 (mRNA vaccine)	Placebo (saline)	II-III	The geometric mean titer ratio of pseudovirus neutralizing antibody titers in adolescents relative to young adults was 1.08 (95% confidence interval [CI], 0.94 to 1.24) Serologic response was 98.8% (adolescent) and 98.6% (young adults), difference 0,2% which there's no inferiority. Efficacy with onset 14 days after second injection: 93.3% Efficacy for prevention with onset 14 days after first inj…	No serious adverse event related to the vaccine	The most common solicited adverse reactions: injection site pain, headache fatigue
55	H M El Sahly et. al	Single-blind	mRNA-1273 (mRNA vaccine)	Placebo	III	- Vaccine efficacy in preventing Covid-19 illness was 93.2% - The efficacy in preventing severe disease was 98.2% - The efficacy in preventing asymptomatic infection starting 14 days after the second injection was 63.0%	None related to vaccination	The most common local adverse event: erythema
56	Angela Choi et. al	Blinded phase (May-June 2020) Open label phase (Jan-Apr 2021)	mRNA-1273 (mRNA vaccine)	No	IIA	Neutralization after booster: Specifically, on day 29, geometric mean titers (GMTs) against the wild-type D614G virus were 16.7-, 11.3-, 46.4- and 9.2-fold higher than day 1 (pre-booster) titers in the mRNA-1273 (50 μg), mRNA-1273.351 (50μg), mRNA-1273.211 (50μg) and mRNA-1273.351 (20 μg) booster recipients, respectively.	None reported	The most common local adverse reaction: injection site pain The most common systemic adverse reaction: fatigue, headache, arthralgia, and myalgia
57	Neil Formica et. al	Single-blind	NVX-CoV2373 (recombinant spike protein vaccine, a protein sub unit vaccine)	Placebo (saline)	II	For the 2-dose regimen of 5 μg, geometric mean titers (GMTs) for IgG anti-spike protein were 65,019 (95% confidence interval (CI) 55,485 to 76,192) and 28,137 (95% CI 21,617 to 36,623) EU/mL and for wild-type virus neutralizing antibody (with an inhibitory concentration of 50%—MN50%) were 2,201 (95% CI 1,343 to 3,608) and 981 (95% CI 560 to 1,717) titers for younger and older participants, respec…	Acute colitis in low dose recipient (1 case), multiple sclerosis in placebo recipient (1 case)	First vaccination: - The most frequent solicited local adverse effect: tenderness and pain - Systemic adverse effect: muscle pain Second vaccination: - Local AE: tenderness, pain - Systemic AE: muscle pain, fatigue, fever
58	Ana C Madeiros-Ribeiro et. al	Open-label	CoronaVac (Inactivated vaccine)	No	IV	The primary outcomes were reduction of ≥15% in both anti-SARS-CoV-2 IgG seroconversion (SC) and neutralizing antibody (NAb) positivity 6 weeks (day 69 (D69)) after the second dose in the ARD group compared with that in the CG. Secondary outcomes were IgG SC and NAb positivity at D28, IgG titers and neutralizing activity at D28 and D69 and vaccine safety. Prespecified endpoints were met, with lowe…	None	After the first dose, the most frequently reported vaccine reactions in patients with ARD and CG were pain at the injection site (19.8 versus 17.%), headache (20.2 versus 11.0%) and somnolence (13.6 versus 10.4%). More frequently reported in patients with ARD than control group (50.5 versus 40.1%), including arthralgia (13.5 versus 6.0%,), back pain (9.8 versus 4.9%), malaise (9.5 versus 4.4%), n…
59	Yongliang Feng et. al	Not stated	Inactivated vaccine of SARS-CoV-2 (name not stated)	No	IV	Divided into 3 groups: 0-14 days, 0-21 days, 0-28 days Seroconversion rate and GMT of SARS-CoV-2 neutralizing antibody in the three groups By day 28 after the second injection, the seroconversion rates of neutralizing antibody (GMT≥16) were all 100.0% in the 0–14, 0–21, and 0–28 groups. SARS-CoV-2 neutralizing antibody with a GMT of 98.4 was noted in the 0–14 group, which was signifcantly lower c…	None	Pain, swelling, pruritus, diarrhea and fatigue within 7 days after vaccination were reported by 4 (1.5%), 2 (0.7%), 1 (0.4%), 0 (0.0%), and 1 (0.4%) subject in the 0–14 days group. In 0-21 days group, 7 (2.6%), 0 (0.0%), 2 (0.7%), 1 (0.4%), and 1 (0.4%) subject. In 0-28 days group, 2 (0.7%), 2 (0.7%), 0 (0.0%), 1 (0.4%), and 2 (0.7%) subject. Rash, cough and headache within 28 days after vaccinat…
60	Miwa Haranaka et. al	Single-blind Placebo-controlled	BNT162b2 (mRNA vaccine)	Placebo (saline)	I/II	One month after dose 2, SARS-CoV-2 50% serum neutralizing geometric mean titers were 571 and 366, and geometric mean fold rises were 55.8 and 36.6, in the younger and older age groups, respectively.	After dose 1: Severe injection site pain (4 participants); severe headache, chills, fatigue, joint pain (1 participant); After dose 2: severe fatigue (4 participants); severe headache (2 participants), severe chills (2 participants), joint pain (1 participants)	The most common reported local reaction after each dose of vaccine: mild to moderate injection site pain The most frequently reported systemic events: fatigue, headache, chills
61	Porntip Itapiboon et. al	Open-label	BNT162b2 (mRNA vaccine)	No	I	RBD Antibodies Intradermal and Intramuscular: - 14 days IM: median 3884 for boost with full dose and 52 BAU/mL for non boosted group - 14 days ID: median = 1952 BAU/mL for boost with standard dose - 28 days after booster with standard dose median 2622 BAU/mL and half dose 1952 BAU/mL - fractional intradermal booster: significantly fewer antibody response (median = 1205 BAU/mL)	None	The common reported: in the intramuscular groups occur fever, headache, myalgia. Intradermal groups occur swelling, erythema, and palpable nodules
