# Supplementary figures and images for: Adverse Events Reporting Quality of Randomized Controlled Trials of COVID-19 Vaccine Using the CONSORT Criteria for Reporting Harms: A Systematic Review
Source: MDPI journal article supplement (doi:10.3390/vaccines10020313), 2022-02-17

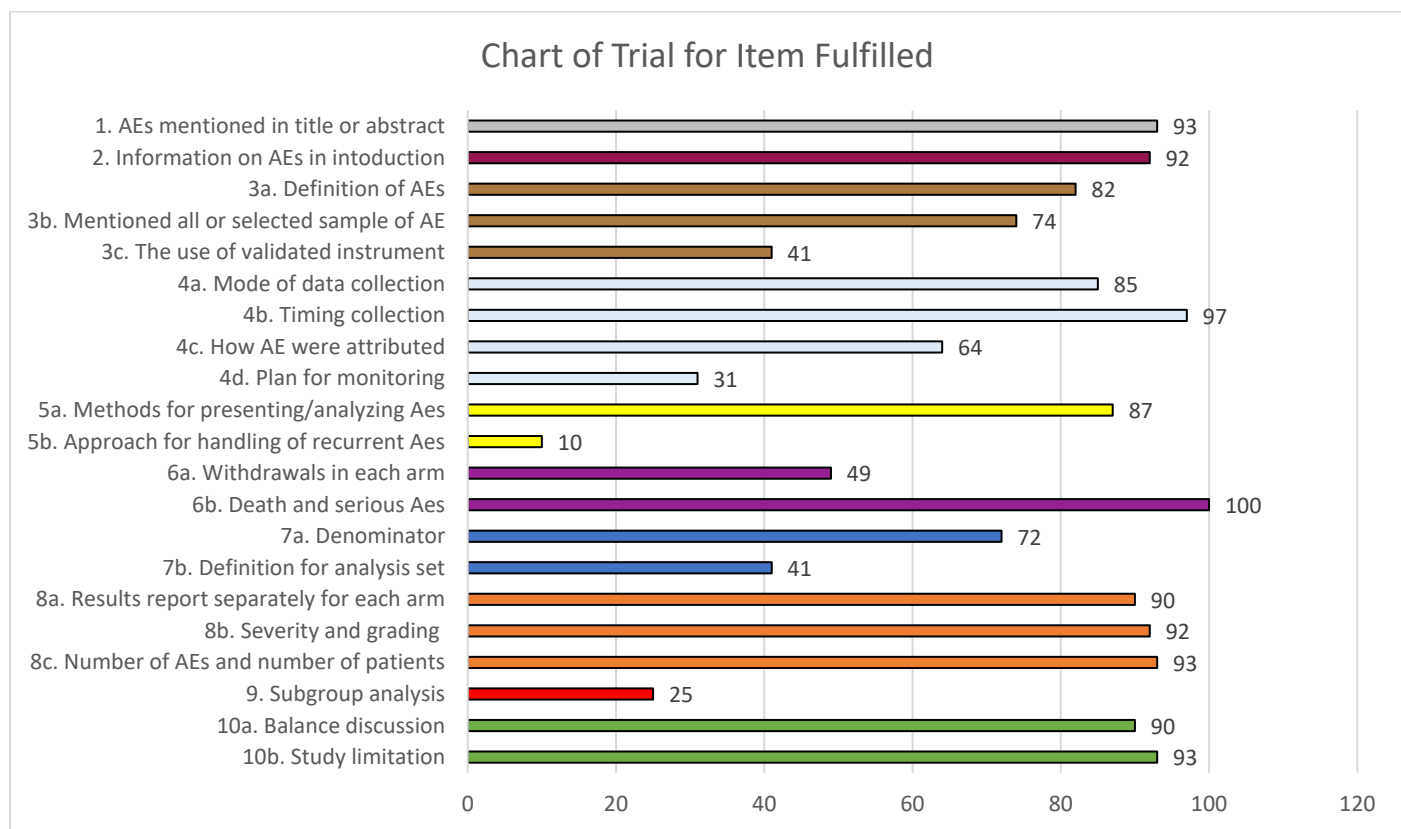

**Supplementary Figure S1. Chart of Trial for Item Fulfilled (N=61)**

Supplement: s1 [file s1]
